# Supplementary material for: Liposomal DQ in Combination with Copper Inhibits ARID1A Mutant Ovarian Cancer Growth
Source: MDPI journal article supplement (doi:10.3390/biom13050744), 2023-04-25
Supplement: s1 [file s1]

| Name       | Forward Sequence (5'-3') | Reverse Sequence (3'-5') |
|------------|--------------------------|--------------------------|
| E-cadherin | CGGGAATGCAGTTGAGGATC     | AGGATGGTGTAAGCGATGGC     |
| Vimentin   | CCTTGAACGCAAAGTGGAATC    | GACATGCTGTTCTGAATCTGAG   |
| N-cadherin | CCTCCAGAGTTTACTGCCATGAC  | GTAGGATCTCCGCCACTGATTC   |
| CD206      | AGCCAACACCAGCTCCTCAAGA   | CAAAACGCTCGCGCATTGTCCA   |
| Actin      | CACCATTGGCAATGAGCGGTTC   | AGGTCTTTGCGGATGTCCACGT   |

**Figure S1.** The primers for qPCR.

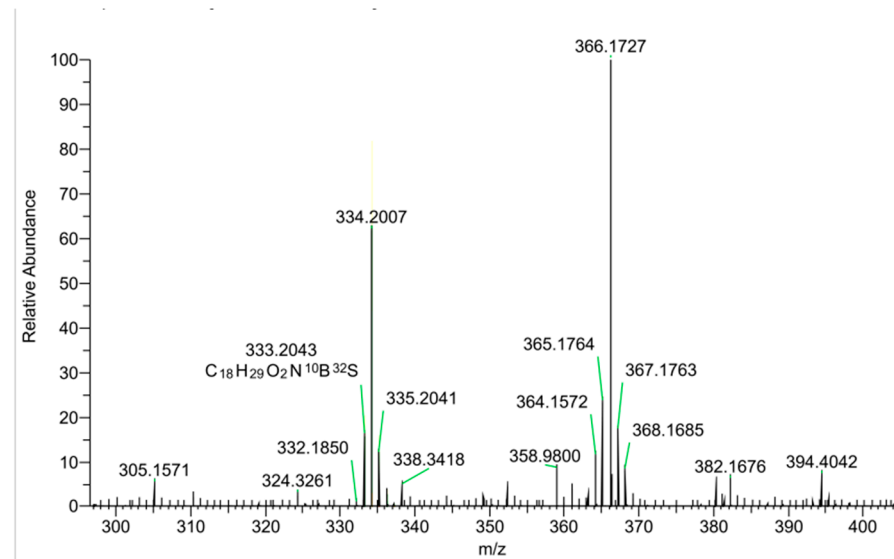

**Figure S2.** The ESI-MS spectrum of DQ (366.17 m/z).

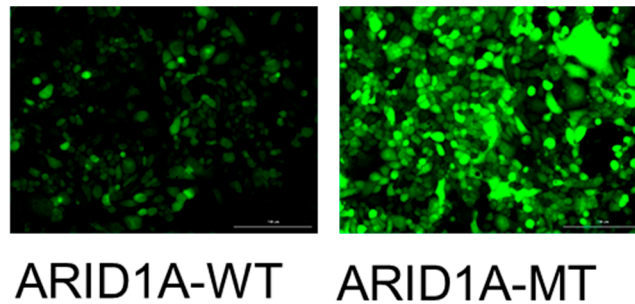

**Figure S3.** The levels of basal ROS ARID1A wildtype (ARID1A-WT) and ARID1A-mutant (ARID1A-MT) cell lines using DCFH-DA probe. Scale bar:200 um.

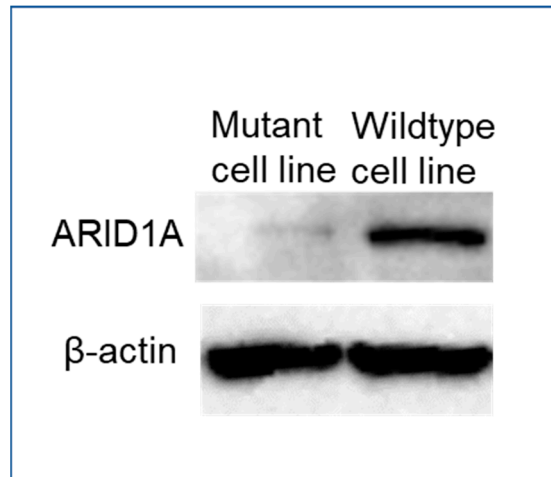

**Figure S4.** The expression of ARID1A in mutant and wildtype cell line using western blot.
